# Supplementary material for: Inventing a facile method to constructBombyx mori(B. mori) silk fibroin nanocapsules for drug delivery
Source: Royal Society of Chemistry journal article supplement (doi:10.1039/d0ra04024j), 2020-01-01
Supplement: d0ra04024j1.pdf [file d0ra04024j1.pdf]

# Inventing a facile method to construct *Bombyx mori* (*B. mori*) silk fibroin nanocapsules for drug delivery

Heming Zheng,<sup>a</sup> Bo Duan,<sup>b</sup> Zheyu Xie,<sup>b</sup> Jie Wang,<sup>\*b</sup> and Mingying Yang<sup>\*b</sup>

<sup>a</sup> Department of Surgical Oncology, Sir Run Run Shaw Hospital, Zhejiang University School of Medicine, East Qingchun Road 3, Hangzhou, Zhejiang, China;

<sup>b</sup> Institute of Applied Bioresource Research, College of Animal Science, Zhejiang University, Zhejiang Provincial Key Laboratory of Utilization and Innovation of Silkworm and Bee Resources, Yuhangtang Road 866, Hangzhou, 310058 Zhejiang, China. Email: [wangjie1987@zju.edu.cn](mailto:wangjie1987@zju.edu.cn); [yangm@zju.edu.cn](mailto:yangm@zju.edu.cn); Tel: +86 571 88982219

\* Corresponding author.

## Supporting information

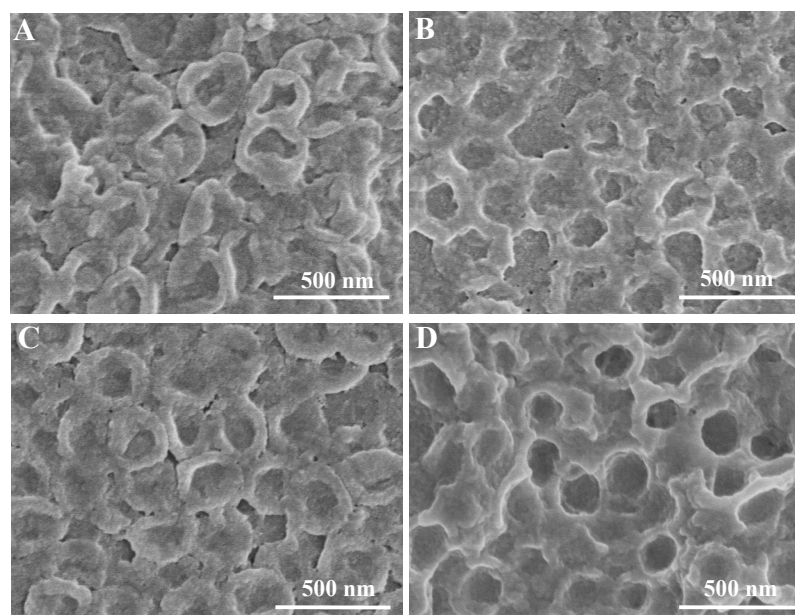

**Fig. S1** SEM (A-D) images showed the hollow structure of SF nanocapsules. The SF layers fabricated the hollow nanocapsules were 3 (A), 6 (B), 9 (C) and 12 (D).

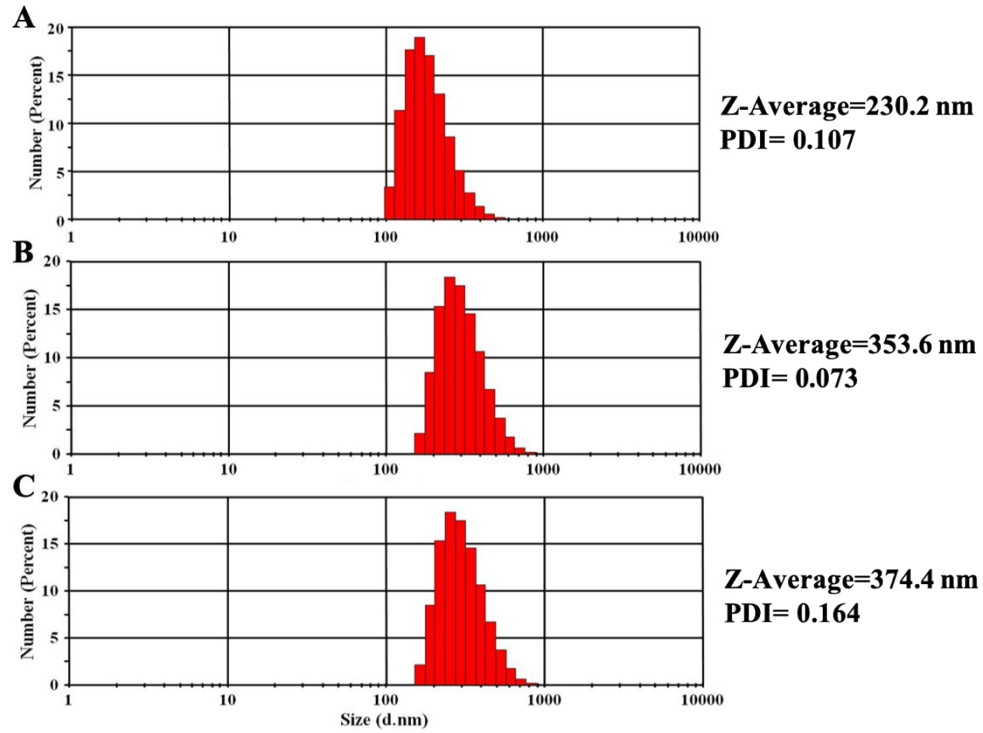

**Fig. S2** Size and dispersity analysis of SF nanocapsules stored in buffer solution for different time. (A) 0 days, (B) 1 weeks, (C) 2 weeks.
